# Supplementary material for: Trends in type 2 diabetes incidence and mortality in Scotland between 2004 and 2013
Source: PubMed Central journal article supplement (PMC5016553; doi:10.1007/s00125-016-4054-9), 2016-07-28
Supplement: 125_2016_4054_MOESM1_ESM.pdf [file 125_2016_4054_MOESM1_ESM.pdf]

**Electronic Supplementary Material – Trends in type 2 diabetes incidence and mortality in Scotland between 2004 and 2013.**

**TABLES:**

**ESM Table 1.** Trends in crude incidence of type 2 diabetes among people aged below 40 years between 2004 and 2013

| Year    | Crude incidence rate (per 1,000 person-years) |
|---------|-----------------------------------------------|
| 2004    | 0.41                                          |
| 2005    | 0.37                                          |
| 2006    | 0.38                                          |
| 2007    | 0.40                                          |
| 2008    | 0.44                                          |
| 2009    | 0.42                                          |
| 2010    | 0.41                                          |
| 2011    | 0.41                                          |
| 2012    | 0.46                                          |
| 2013    | 0.44                                          |
| Overall | 0.42                                          |

**ESM Table 2.** Mean glycosylated haemoglobin levels within one month of date of diagnosis of type 2 diabetes by year

| Year | Mean Glycosylated Haemoglobin within 1 month of type 2 diabetes diagnosis, mmol/mol (SD) |
|------|------------------------------------------------------------------------------------------|
| 2004 | 66.8 (24.1)                                                                              |
| 2005 | 68.3 (24.5)                                                                              |
| 2006 | 68.9 (25.1)                                                                              |
| 2007 | 68.2 (25.2)                                                                              |
| 2008 | 67.0 (24.5)                                                                              |
| 2009 | 66.3 (24.6)                                                                              |
| 2010 | 66.4 (24.6)                                                                              |
| 2011 | 67.2 (23.9)                                                                              |
| 2012 | 67.2 (23.9)                                                                              |
| 2013 | 65.9 (23.0)                                                                              |

**FIGURES:**

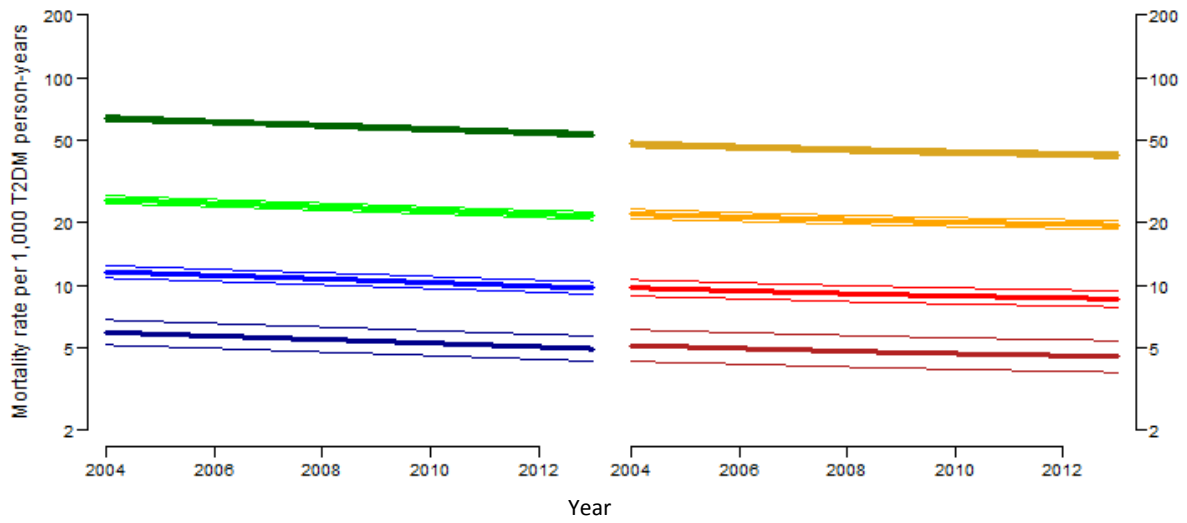

**ESM Fig 1.** Trends in mortality rates for men (left panel, ages: dark green=75 years, light green=65 years, light blue=55 years, navy blue=45 years) and women (right panel, ages: dark yellow=75 years, light yellow=65 years, light red=55 years, dark red=45 years) in deprivation decile 5 by age.

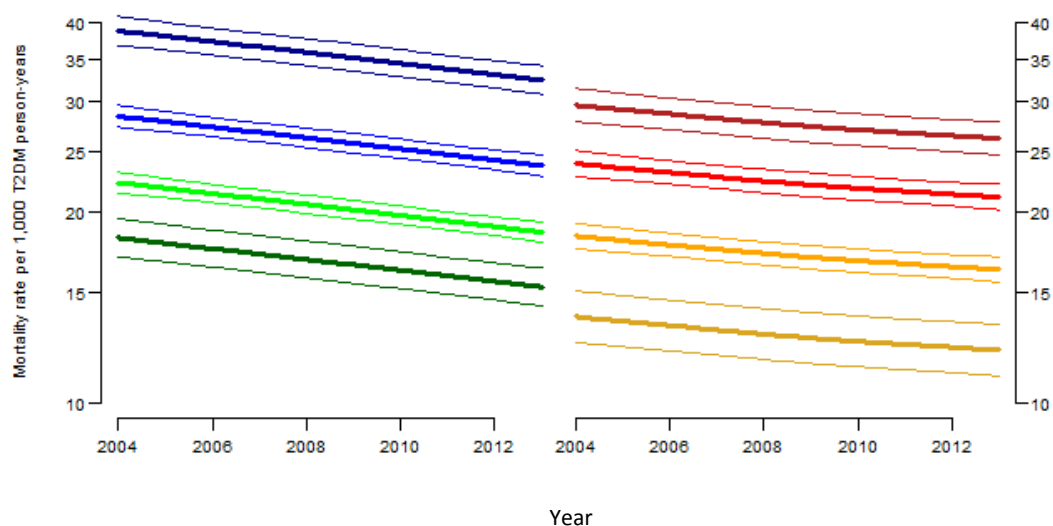

**ESM Fig 2.** Trends in mortality rates for men (left panel, deprivation deciles: dark blue =D1 (Most deprived), light blue = D4, light green = D7, dark green = Q10(Least deprived) and women (right panel, deprivation deciles: dark red =D1 (Most deprived), light red = D4, light yellow = D7, dark yellow = D10(Least deprived))) aged 65 years by deprivation deciles.

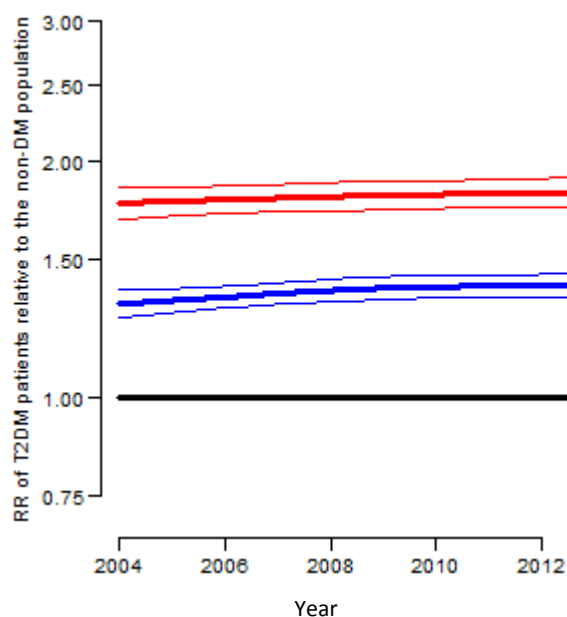

**ESM Fig 3.** Trends in relative mortality among people with type 2 diabetes compared to people without diabetes between 2004 and 2013 for men (blue line) and women (red line) aged 65 years in deprivation decile 5

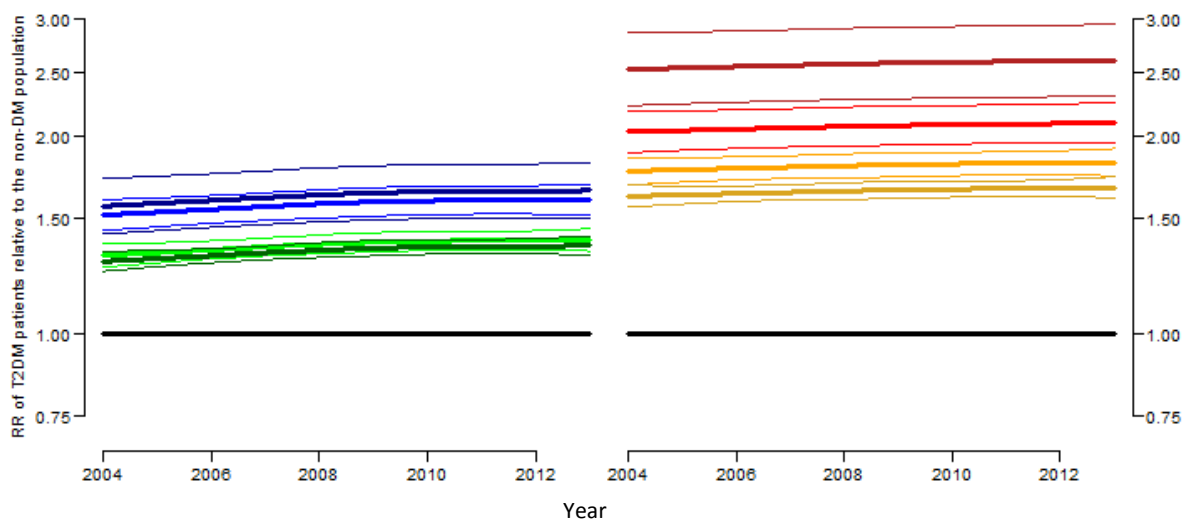

**ESM Fig 4.** Relative mortality among men (left panel, ages: dark green=75 years, light green=65 years, light blue=55 years, navy blue=45 years) and women (right panel, ages: dark yellow=75 years, light yellow=65 years, light red=55 years, dark red=45 years) with type 2 diabetes in deprivation decile 5 compared to people without diabetes between 2004 and 2013 by age.

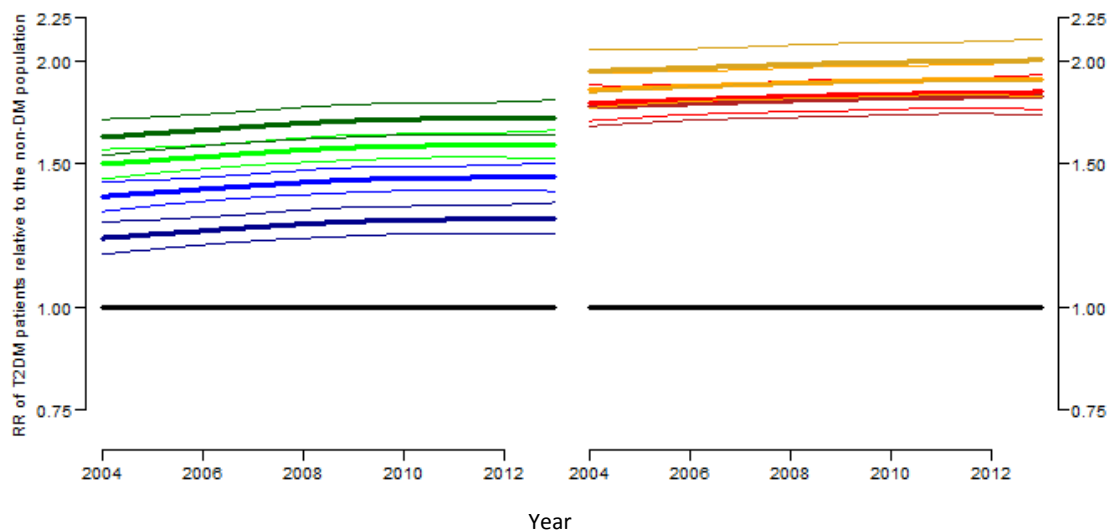

**ESM Fig 5.** Relative risk of mortality among men (left panel, deprivation deciles: dark blue =D1 (Most deprived), light blue = D4, light green = D7, dark green = D10(Least deprived)) and women (right panel, deprivation deciles: dark red =D1 (Most deprived), light red = D4, light yellow = D7, dark yellow = D10(Least deprived)) with type 2 diabetes compared to people without diabetes between 2004 and 2013 by deprivation and sex.
